# Supplementary material
Source: PubMed Central journal article supplement (PMC3030382)
Supplement: supp_M110.118018_jbc.M110.118018-1.pdf [file supp_M110.118018_jbc.M110.118018-1.pdf]

A.

IP: P2Y12

IB: PAR4

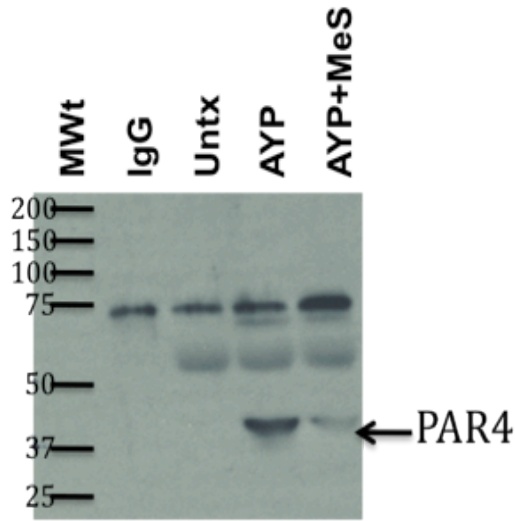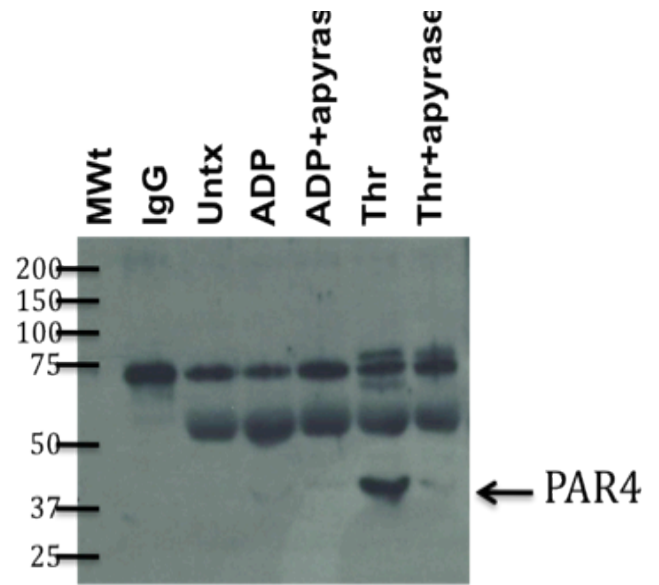

IB: P2Y12

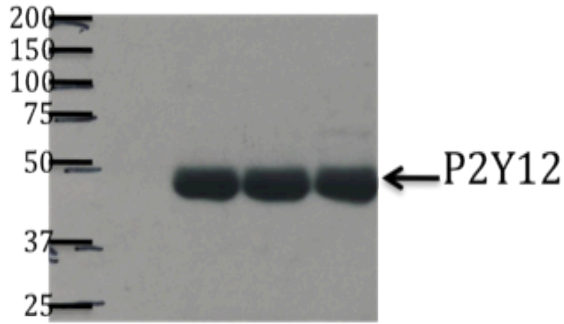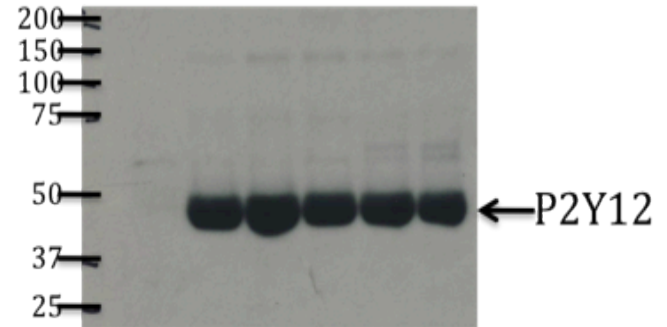

B.

IP: PAR4

IB: P2Y12

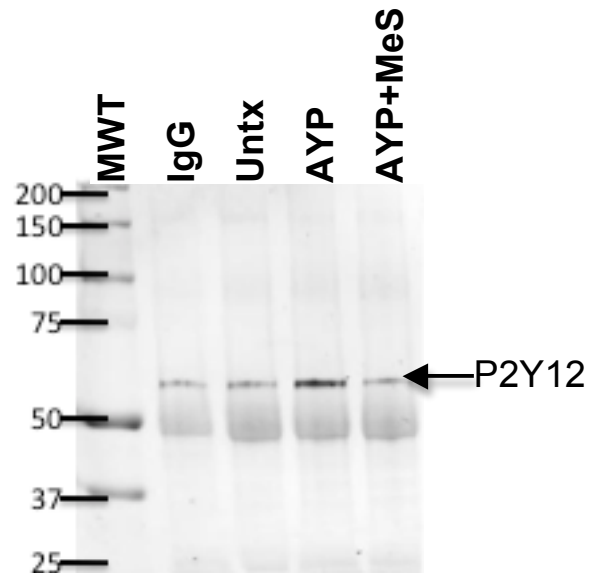

IB: PAR4

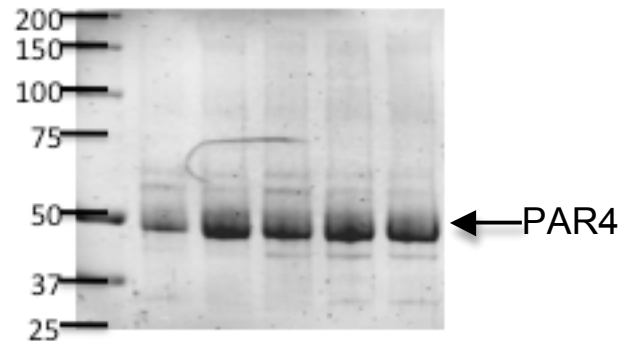

Supplemental  
Data Figure

**Supplemental Data Figure:** Agonist-dependent association of PAR4 and P2Y12 **A.** Human platelets ( $4 \times 10^8$ /lane) were treated with AYPGKF (150uM), ADP (10 $\mu$ M), or Thrombin (0.1U) for 5 minutes at 37°C with /without 2MeSAMP (100  $\mu$ M) or Apyrase (1U/ml), then immunoprecipitated with either IgG control or antibody to P2Y12 (2 $\mu$ g/ml). Precipitates were immunoblotted with anti-PAR4 antibodies (1:1000). The blot from 25 to 200 kD is shown. **B.** Human platelets treated as above were immunoprecipitated with antibody to PAR4 (2 ug/ml), then immunoblotted with antibody to P2Y12 (1:1000).
